# Supplementary material
Source: Springer Nature journal article supplement (https://www.springermedizin.de/resource/supplementary/12939_2006_56_MOESM4_ESM.pdf/9551424)

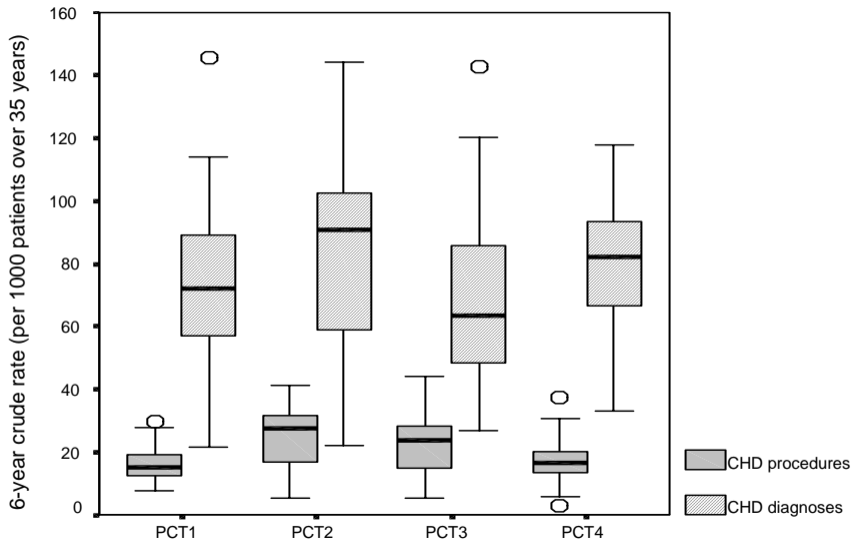

Supplement: MOESM4 [file 9551424]
